# Supplementary material
Source: Springer Nature journal article supplement (https://www.springermedizin.de/resource/supplementary/12968_2008_18_MOESM8_ESM.pdf/9577794)

(a)

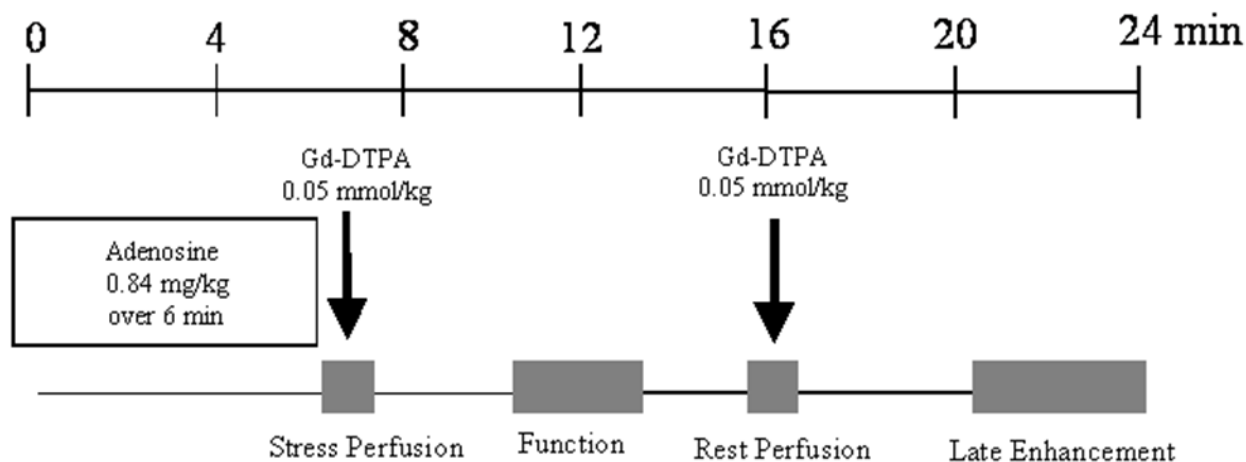

(b)

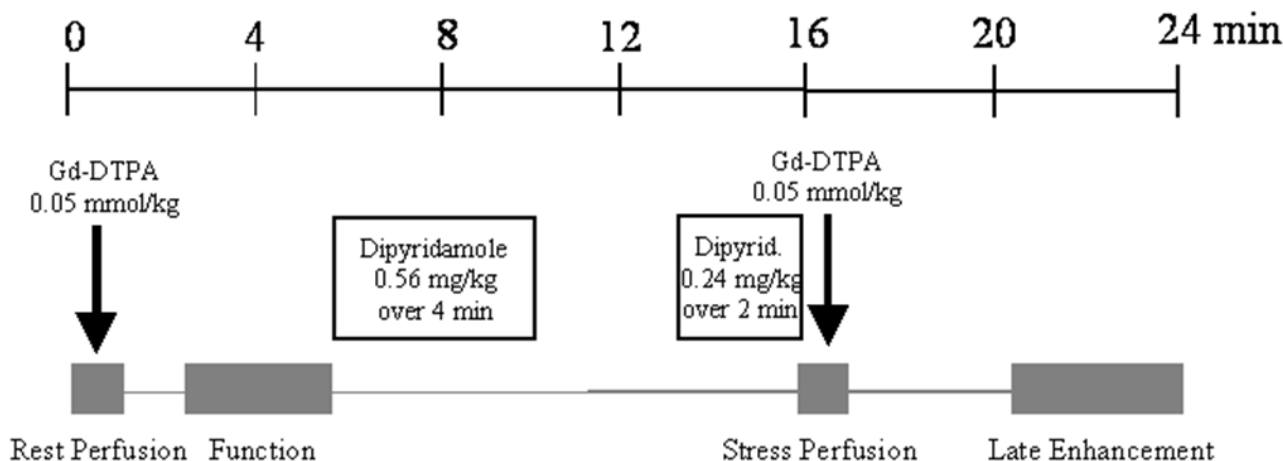

Supplement: MOESM8 [file 9577794]
